# Supplementary material for: Self-propulsion of catalytic nanomotors synthesised by seeded growth of asymmetric platinum–gold nanoparticles
Source: Royal Society of Chemistry journal article supplement (doi:10.1039/c7cc09436a), 2018-01-01
Supplement: c7cc09436a1.pdf [file c7cc09436a1.pdf]

## Supplementary Information

### Self-propulsion of catalytic nanomotors synthesised by seeded growth of asymmetric platinum-gold nanoparticles

Ibon Santiago<sup>a</sup>, Luyun Jiang<sup>b</sup>, John Foord<sup>b\*</sup> and Andrew J. Turberfield<sup>a\*</sup>

<sup>a</sup> *Department of Physics, University of Oxford, Clarendon Laboratory, Parks Road, Oxford OX1 3PU, United Kingdom*

<sup>b</sup> *Department of Chemistry, University of Oxford, South Parks Road, Oxford, OX1 3TA, United Kingdom*

#### Methods/Experimental

##### M1 | Materials and reagents

Reagents were purchased from Sigma-Aldrich and are of A.C.S. reagent grade unless otherwise stated. All solutions and subsequent dilutions were prepared with Milli-Q water (>18 MΩ cm).

##### M2 | Chemical synthesis of Au-Pt NP

Pt-Au NP were synthesised by stirring 1 mL of monodisperse 15 nm Au nanoparticles ( $1.4 \times 10^{12}$  particles/mL in 2mM sodium citrate, BBI) and 100 μl of K<sub>2</sub>PtCl<sub>4</sub> (final concentration 0.1 mM) for 15 min, then slowly adding 20 μl 1mM NaBH<sub>4</sub> dropwise, while stirring, until a colour change from red to dark red occurred (SI Figure S2). A final K<sub>2</sub>PtCl<sub>4</sub> concentration of 0.1mM corresponds to a Pt ion: Au atom ratio of 1:3. Where other K<sub>2</sub>PtCl<sub>4</sub> concentrations are indicated in the text, all other quantities (including final volume) are unchanged.

##### M3 | Electrochemical measurements of catalytic activity

Electrochemical measurements were performed at room temperature (20±2°C) with μ-AUTOLAB III potentiostat (Eco-Chemie, Netherlands) running GPES software. A three-

electrode system was used consisting of a Pt wire as counter electrode, an Ag/AgCl reference electrode, and a working electrode prepared by dropping 10  $\mu\text{l}$  of 0.02 mg/L 10 nm Ag NP (0.01 mg/ml, Sigma-Aldrich) onto a 0.37  $\text{cm}^2$  glassy carbon surface (GCE). A rotating disk electrode (RDE) was used at a rotating speed of 1300 rpm. The potential was held at -0.6 V in solution containing 25 mM  $\text{H}_2\text{O}_2$  and 0.1 M KCl. After the current baseline stabilised, a solution of catalyst particles was added. The current decreased linearly after few seconds, corresponding to the decomposition of  $\text{H}_2\text{O}_2$  in solution (the calibration is shown in SI-Figure 5a). The catalytic activity was calculated from fitted slopes and the calibration using a catalase standard (SI-Figure 5b and c).

#### **M4 | Characterisation of Pt-Au particles**

The chemical composition of the particle surface was measured using X-ray photoelectron spectroscopy (XPS, VG Escalab with Al-K X-ray source). XPS energy spectra of ejected electrons were processed using CasaXPS software for peak fitting and identification.

Dynamic light scattering (DLS) measurements were carried out in a Zetasizer Nano (Malvern) with an instrument scattering angle of  $173^\circ$ . As-prepared samples were diluted 8 times and were added to a 40 $\mu\text{l}$ -disposable plastic micro cuvette (ZEN0040) together with the appropriate amount of  $\text{H}_2\text{O}_2$ , resulting in the indicated final concentrations of  $\text{H}_2\text{O}_2$ . The sample was immediately loaded into the machine and 14 measurements of 10 s each were taken at  $25^\circ\text{C}$ . This was repeated 3 times for each sample. The reported diffusion constants were computed from the intensity of the scattered light using the proprietary Malvern software package at its standard settings. The software uses cumulant analysis to extract mean diffusion coefficients  $D$  and distribution analysis to obtain diffusion-coefficient distribution curves from fitting measured intensity autocorrelation functions  $g_2(t)$ .

Particle morphology was analysed by TEM (FEI Tecnai 12 at 120 keV) and HAADF-STEM (JEOL ARM-200F equipped with EDX). Samples for TEM were prepared on carbon-coated Cu grids by drop-casting and evaporation.

**SI- Figure 1** | UV-vis spectra for uncoated 15 nm Au NP, asymmetric Pt-Au NP (prepared with precursor  $K_2PtCl_4$  concentration 0.1 mM) and approximately symmetric Pt-Au NP (with precursor  $K_2PtCl_4$  1 mM). As Pt grows the characteristic Au plasmon resonance peak weakens.

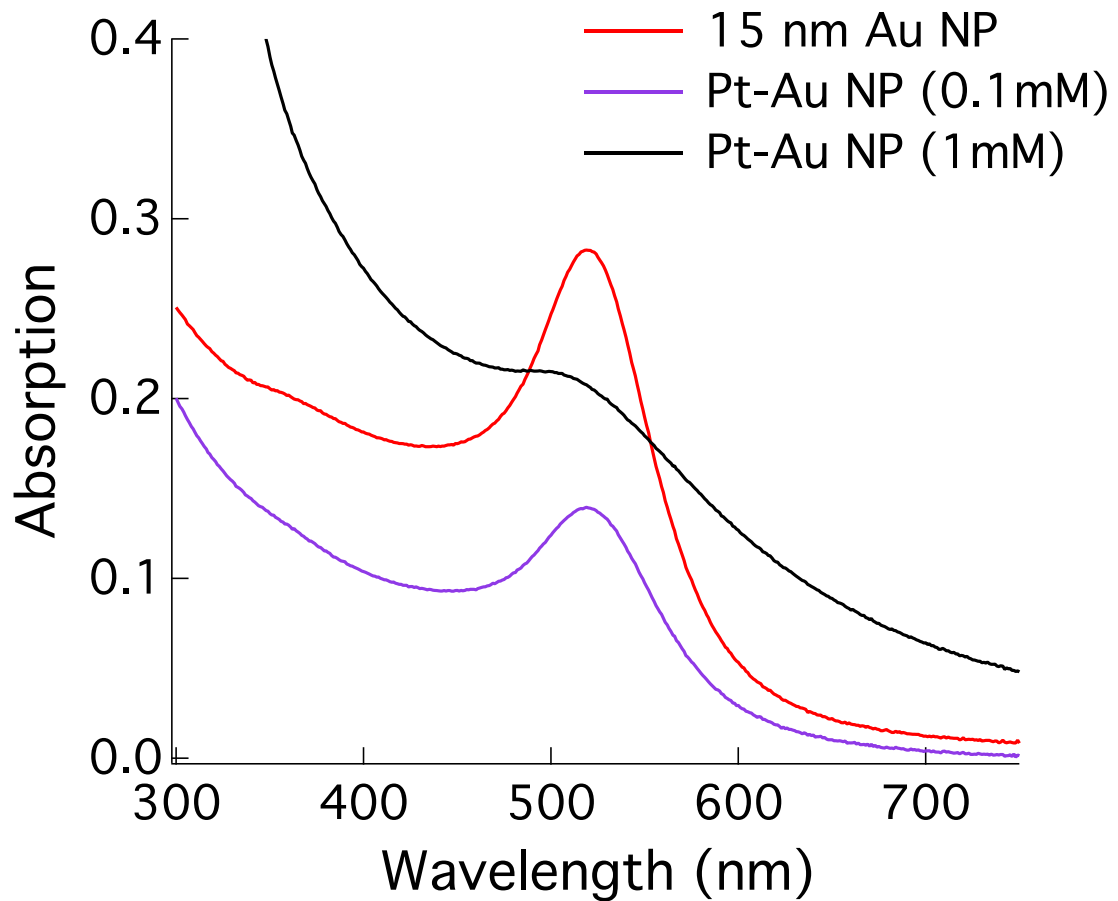

**SI- Figure 2** | Platinum growth on Au NP. TEM micrographs and size distributions (hydrodynamic radius) measured by DLS of **(a)** 15 nm Au nanoparticles and **(b-c)** Pt-Au NP prepared with increasing concentrations of  $K_2PtCl_4$  (**b** 0.1 mM, **c** 1mM and **d** 3mM). Scale bars: 50 nm.

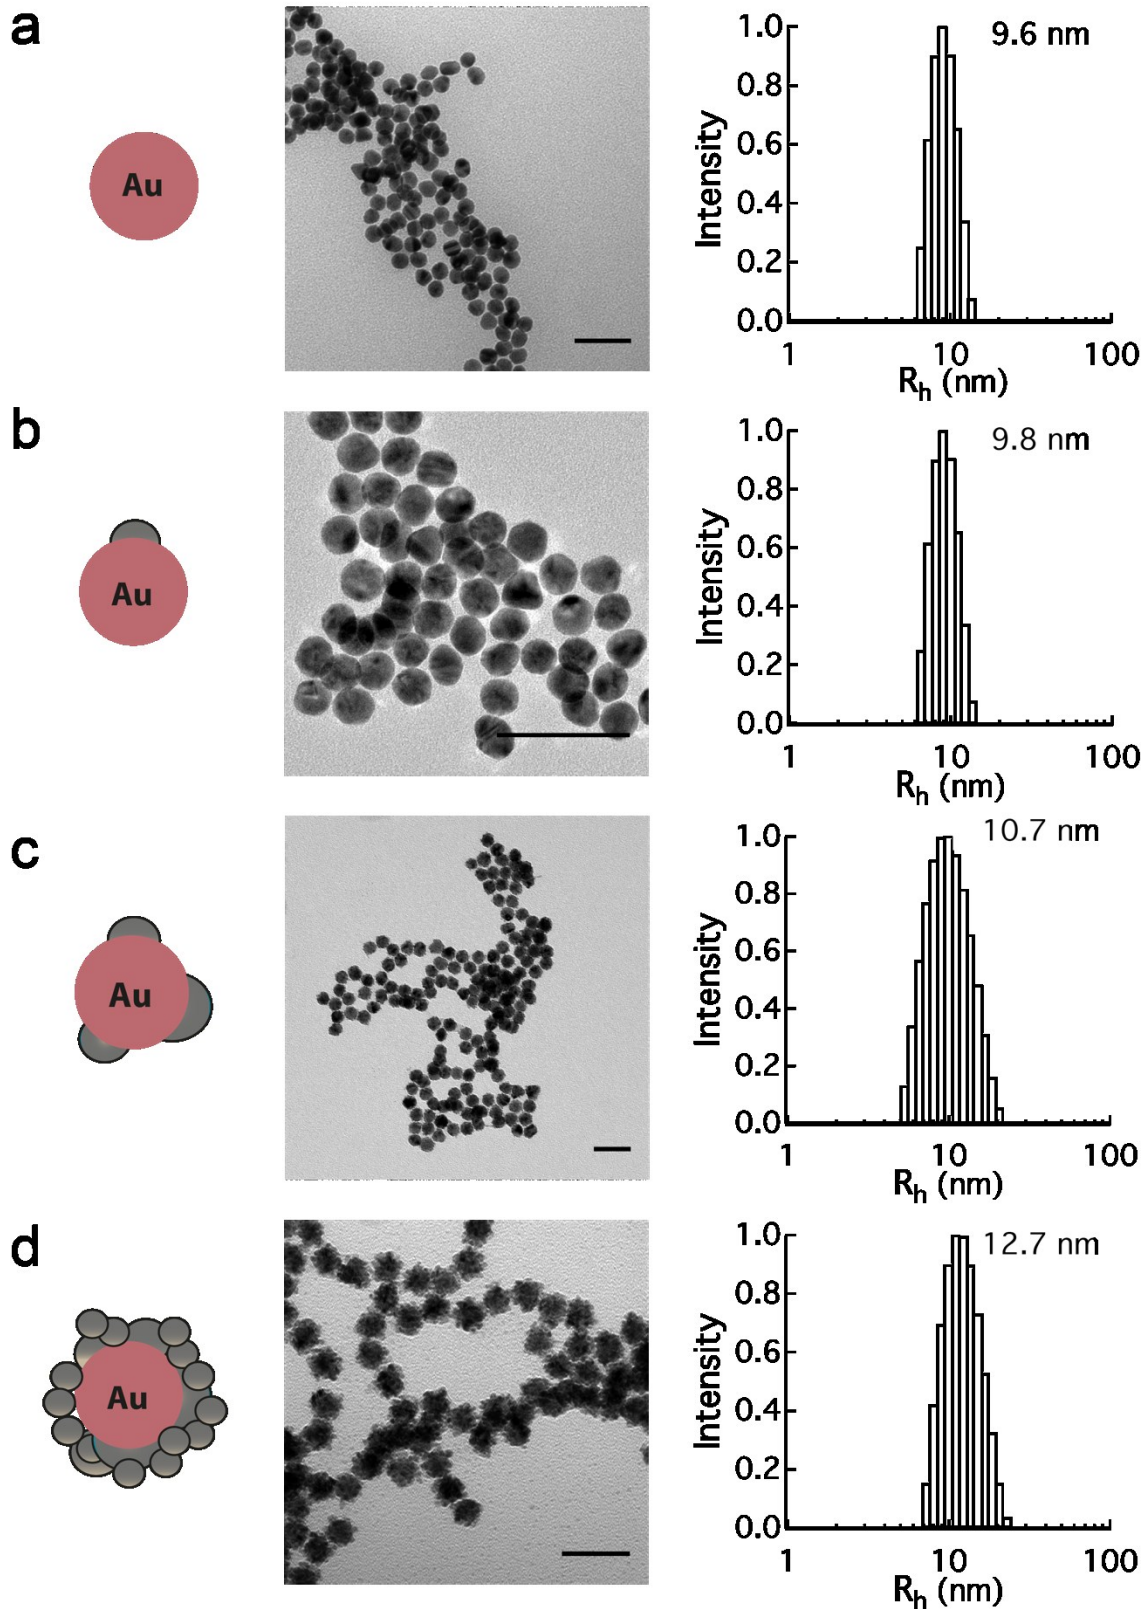

**SI- Figure 3** | X-ray photoelectron spectroscopy (XPS) analysis of nanoparticle surface compositions for **(a)** 15 nm Au nanoparticles and **(b-d)** Pt-Au NP prepared using increasing initial concentrations of  $K_2PtCl_4$  (**b** 0.1 mM, **c** 1 mM and **d** 3 mM). Grey lines represent the raw data; smooth solid and dashed lines are curve-fitting results.

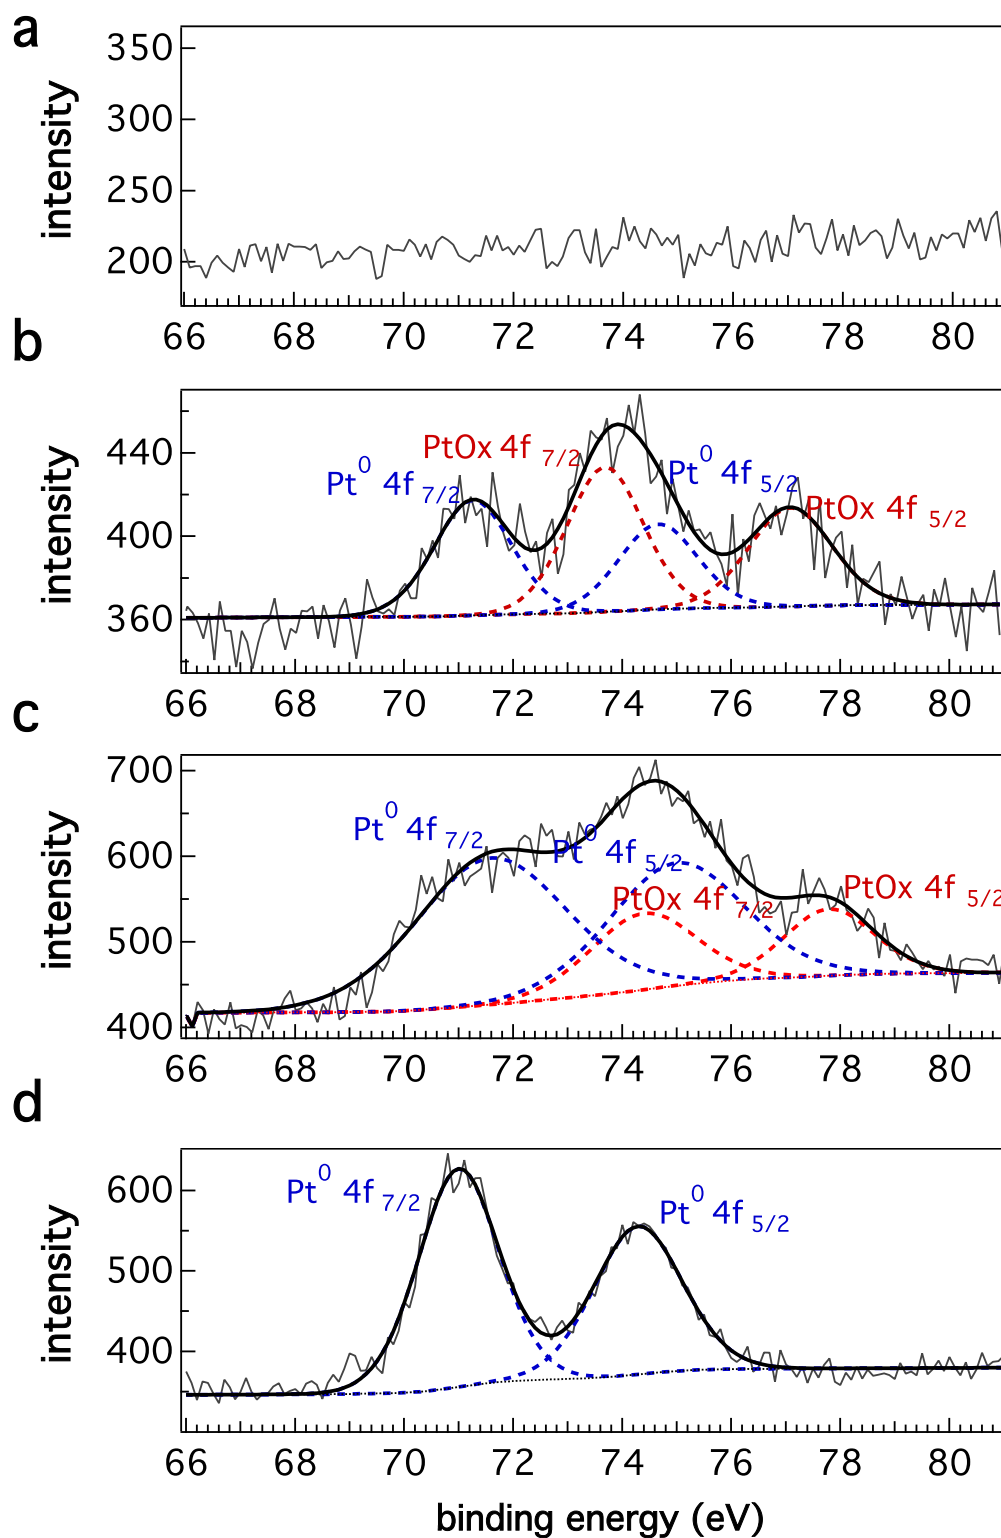

**SI- Figure 4** | (a,b) TEM micrographs of unfiltered physical mixtures of reduced Pt (Pt precursor concentration of 3 mM) and Au NP. Reduced Pt and unchanged Au NP can be distinguished. (c,d) TEM micrographs of asymmetric Pt-Au NP with distinguishable Pt clusters (precursor concentration 0.1 mM). Scale bars: 20 nm.

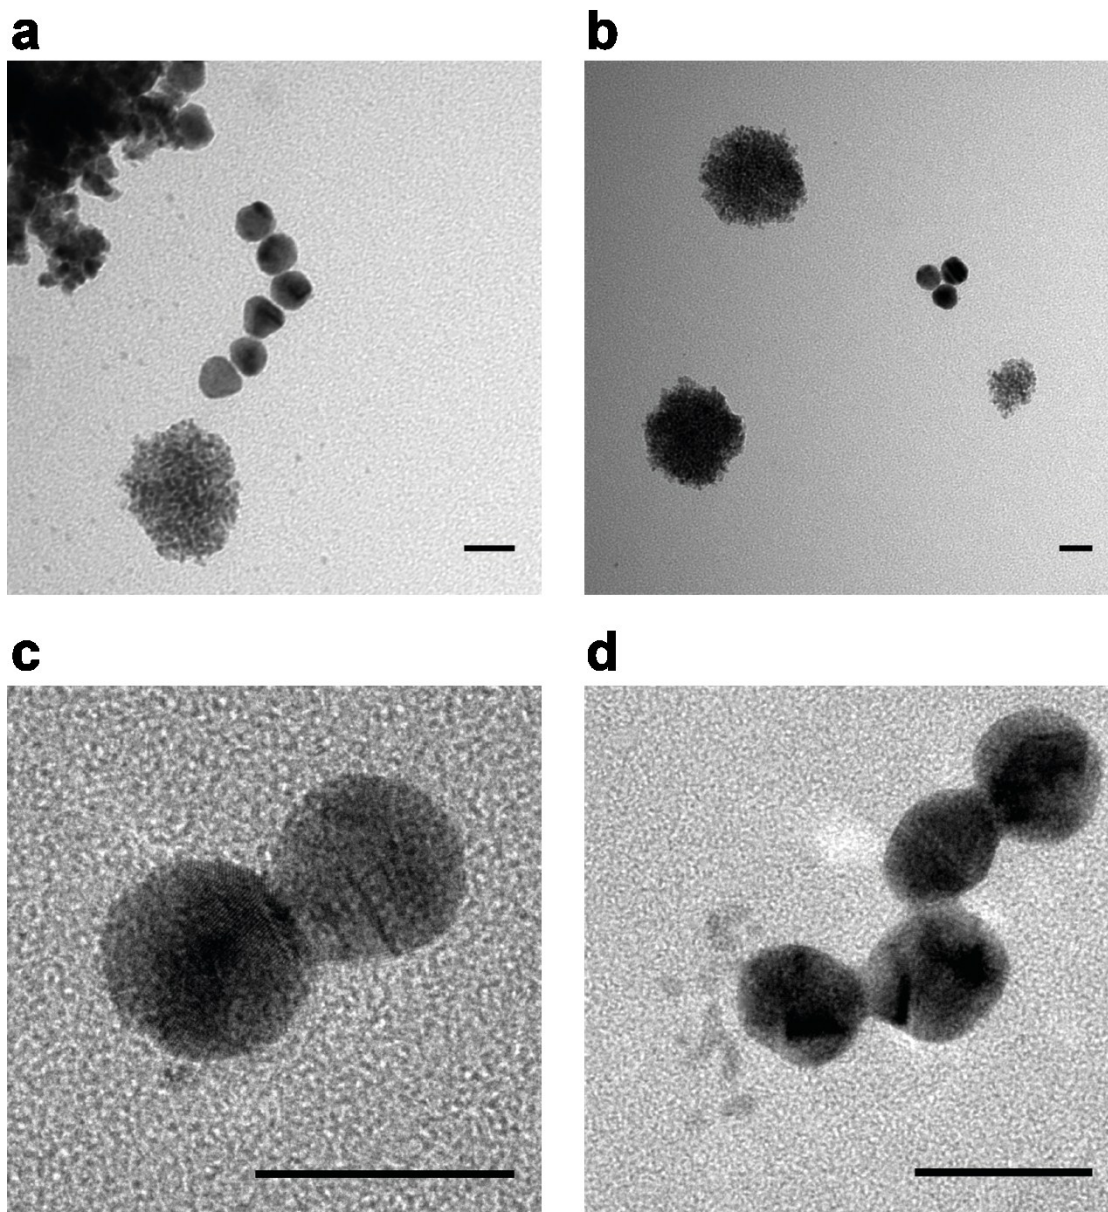

**SI- Figure 5** | Electrochemical characterisation of the catalytic activity of Pt-Au NP. A Ag-coated glassy carbon electrode, prepared by dropping 10  $\mu\text{L}$  of 0.02 mg/L 10 nm Ag NP onto a 0.37  $\text{cm}^2$  glassy carbon surface, was used as a  $\text{H}_2\text{O}_2$  sensor. **(a)** Amperometric response of the  $\text{H}_2\text{O}_2$  sensor at a constant potential of -0.6 V vs. Ag/AgCl in 0.1 M KCl solution with successive additions of  $\text{H}_2\text{O}_2$ . Inset: cathodic peak current vs.  $\text{H}_2\text{O}_2$  concentration, with a slope of 4.63  $\text{mM}/\mu\text{A}$ . **(b)** Amperometric response after successive additions of 10  $\mu\text{L}$  15 nm Au NP, control solution (reduced Pt physically mixed with Au NP; Pt precursor concentration 0.1 mM) and asymmetric Pt-Au NP (Pt precursor concentration 0.1 mM) into 25 mM  $\text{H}_2\text{O}_2$ . **(c)** Decrease of  $[\text{H}_2\text{O}_2]$  after addition of various concentrations of 5 nm Pt NPs (from 78 pM to 1.5 nM, see insert). Inset: initial  $\text{H}_2\text{O}_2$  decomposition rate vs. Pt NP concentration. **(d)** Decrease of  $[\text{H}_2\text{O}_2]$  after addition of various concentrations of catalase (from 64 to 510 pM, see insert). Inset: initial  $\text{H}_2\text{O}_2$  decomposition rate vs. catalase concentration. Measurements with both Pt NP and catalase show a linear relationship between catalyst concentration and slope (change of  $\text{H}_2\text{O}_2$  over time) for low catalytic activities (slope < 0.08  $\text{mM}/\text{s}$ ). Using catalase as a cross-calibration standard (rate = 100%), a catalytic rate of 2.5% was measured for an equivalent particle concentration of asymmetric Pt-Au NP, 7.4% for thick layer core-shell Pt-Au NP (Pt precursor concentration 3 mM) and 0.29% for the control solution.

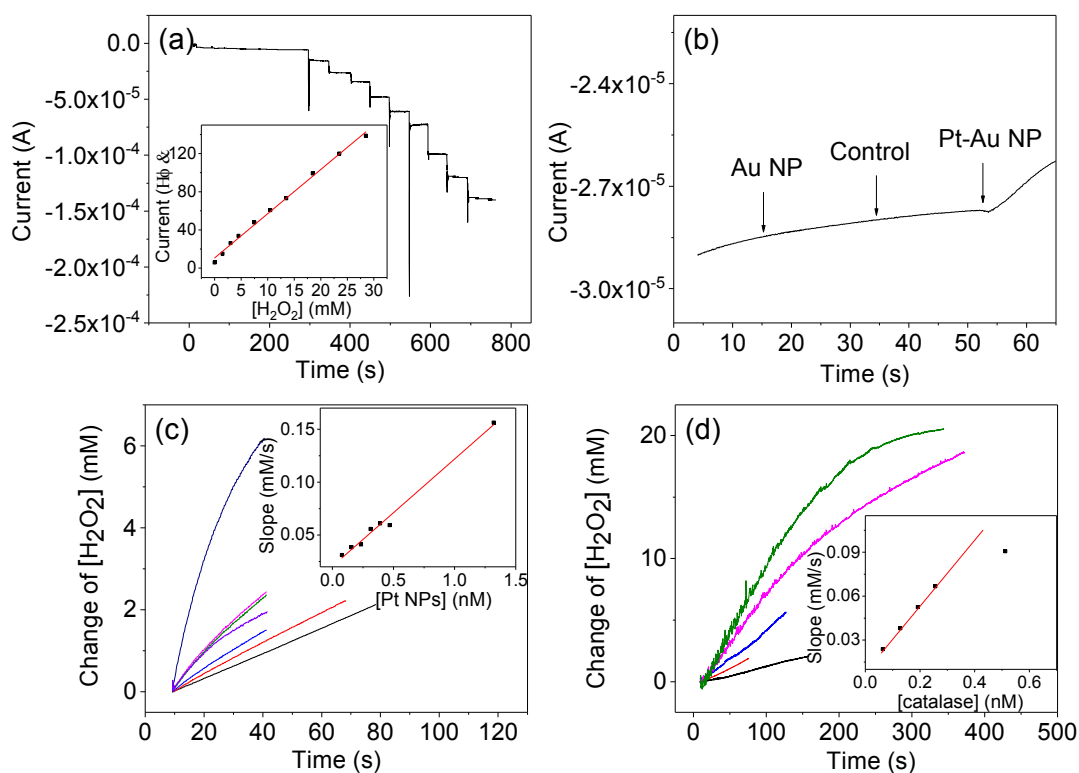

**SI- Figure 6** | Distributions of asymmetric Pt-Au NP diffusion coefficients inferred from DLS with increasing concentrations of H<sub>2</sub>O<sub>2</sub> **(a)** in water and **(b)** in a viscous medium. Curves are obtained using the Malvern general purpose scattered intensity-weighted diffusion coefficient distribution analysis (non-negative least squares (NNLS)). The arrow indicates a consistent shift in peak diffusion with increasing H<sub>2</sub>O<sub>2</sub>.

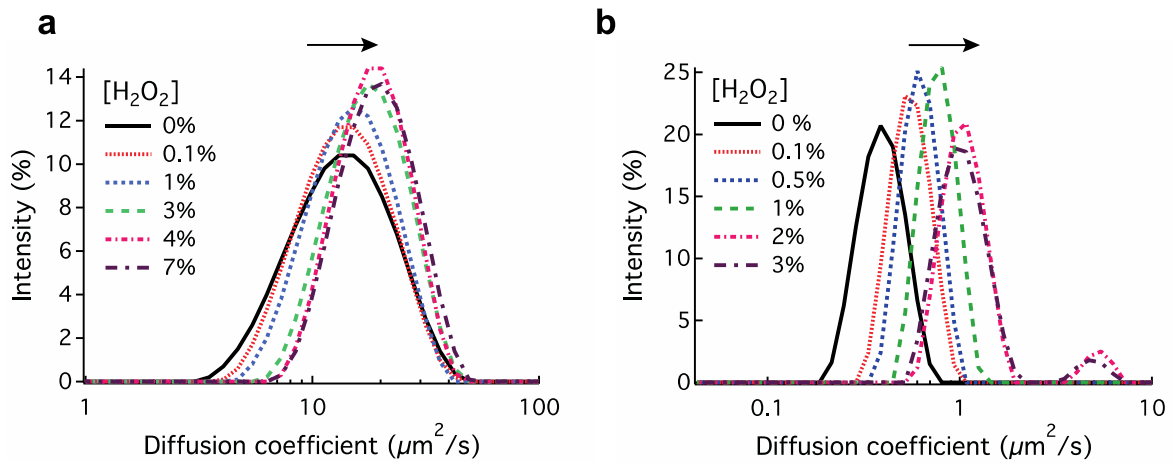



**SI- Figure 7** | DLS autocorrelation functions and diffusion coefficient distributions in H<sub>2</sub>O<sub>2</sub> for: **(a)** Au NP (red) and control solution of Au NP physically mixed with reduced Pt with 2% (v/v) H<sub>2</sub>O<sub>2</sub> (dashed black) and without (solid black); **(b)** thick layer core-shell Pt-Au NP with 0.1% (v/v) H<sub>2</sub>O<sub>2</sub> (red) and without (solid black). Measurements at higher fuel concentrations were impractical as a result of oxygen bubble formation caused by the high catalytic activity of these particles. An erroneous autocorrelation function is shown (dashed line) is shown in part b as an example of invalid data affected by bubble formation or aggregation; such does not meet the quality criteria and is removed from the analysis. Neither sample shows evidence of a significant increase in apparent diffusivity on addition of fuel.

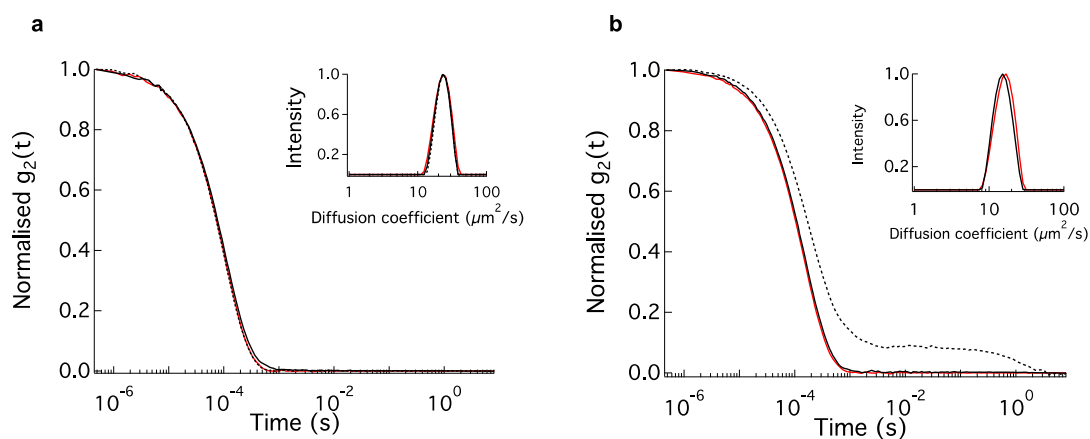

### SI- Figure 8 DLS diffusion measurement of 5 nm Pt NP in viscous solution.

The diffusion coefficient for 5 nm Pt NP (in units of  $D_0=0.87\mu\text{m}^2\text{s}^{-1}$ ) is plotted as a function of  $\text{H}_2\text{O}_2$  concentration, averaged over 3 experimental runs (error bars indicate standard deviations). A decrease of 40% in diffusivity in 2% (v/v)  $\text{H}_2\text{O}_2$  is observed. A similar observation has been reported<sup>1</sup> for 30 nm Pt NP in water; this was attributed to a slight increase in viscosity in the presence of  $\text{H}_2\text{O}_2$ . While viscosity does increase with  $\text{H}_2\text{O}_2$  concentration, the magnitude of the change (1.01 cP for 8% (m/m)  $\text{H}_2\text{O}_2$  vs. 1.001 cP for  $\text{H}_2\text{O}$  at 20 °C)<sup>2</sup> is insufficient to account for the measured change in diffusivity. The apparent decrease of diffusivity may result from the accumulation of gaseous oxygen around the Pt NP.

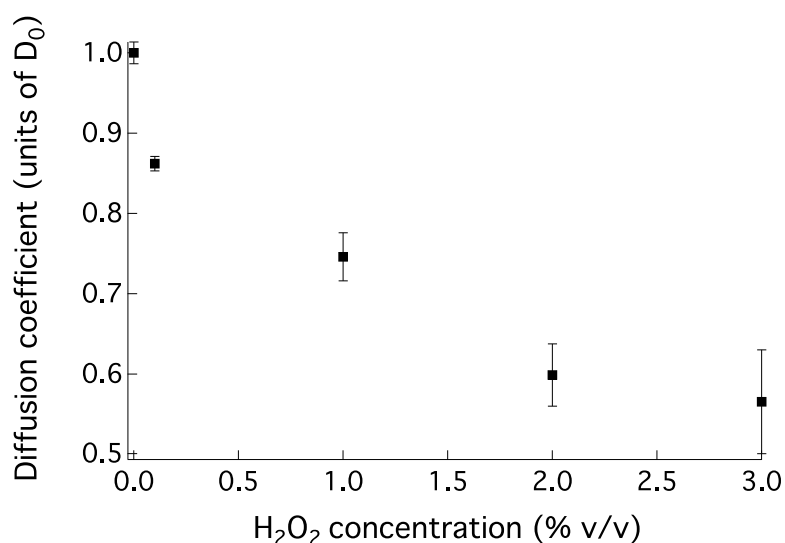

### References

- 1 T.-C. Lee, M. Alarcón-Correa, C. Miksch, K. Hahn, J. G. Gibbs and P. Fischer, *Nano Lett.*, 2014, **14**, 2407–2412.
- 2 M. K. Phibbs and P. A. Giguère, *Can. J. Chem.*, 1951, **29**, 173–181.
